# academic.oup.com

## Performing security verification

This website uses a security service to protect against malicious bots. This page is displayed while the website verifies you are not a bot.
