# Project Appraisal and Planning Twenty Years On

[Get access >](#)

I. M. D. Little , J. A. Mirrlees

*The World Bank Economic Review*, Volume 4, Issue suppl\_1, December 1990,  
Pages 351–382, [https://doi.org/10.1093/wber/4.suppl\\_1.351](https://doi.org/10.1093/wber/4.suppl_1.351)

**Published:** 01 December 1990

## Abstract

This paper discusses the use and usefulness of social cost-benefit analysis. It briefly recalls the main features of the procedures put forward in the book by the authors and addresses some of the issues that have arisen in theoretical work since the early 1970s, particularly the implications of uncertainty. An analysis of the value of project appraisal under uncertainty is provided. The rise and decline of project appraisal in the World Bank and elsewhere is charted, and reasons are considered. Particular attention is given to the difficulty of using shadow prices and to the institutional environment. It is argued that evidence from analysis of the World Bank's projects is consistent with placing a high value on the process of economic appraisal. The costs of appraisal are noted, as is the need to avoid excessive complexity. The paper argues for the importance of an economic appraisal system and of attending to the incentives that operate in such a system.

This content is only available as a PDF.

© 1991 The International Bank for Reconstruction and Development / THE WORLD BANK.

**Issue Section:** [Articles](#)

You do not currently have access to this article.

**Sign in**

 [Get help with access](#)

## Personal account

- Sign in with email/username & password
- Get email alerts
- Save searches
- Purchase content
- Activate your purchase/trial code
- Add your ORCID iD

Sign in >

[Register](#)

## Institutional access

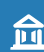

Sign in through your institution

[Sign in through your institution](#)

[Sign in with a library card](#)

[Sign in with username/password](#)

[Recommend to your librarian](#)

## Institutional account management

[Sign in as administrator](#)

## Purchase

[Subscription prices and ordering for this journal](#)

[Purchasing options for books and journals across Oxford Academic](#)

## Short-term Access

To purchase short-term access, please sign in to your personal account above.

Don't already have a personal account? [Register](#)

Project Appraisal and Planning Twenty Years On - 24 Hours access

EUR €39.00

GBP £33.00

USD \$43.00

## Rental

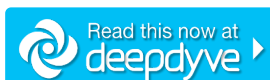

This article is also available for rental through DeepDyve.
